# Supplementary material for: Redox Reactivity of Nonsymbiotic Phytoglobins towards Nitrite
Source: MDPI journal article supplement (doi:10.3390/molecules29061200), 2024-03-07
Supplement: s1 [file s1]

## Supplementary material

### Redox reactivity of nonsymbiotic phytoglobins towards nitrite

Cezara Zagrean-Tuza <sup>1</sup>, Galaba Pato <sup>1</sup>, Grigore Damian <sup>2</sup>, Radu Silaghi-Dumitrescu <sup>1</sup>, Augustin C. Mot <sup>1\*</sup>

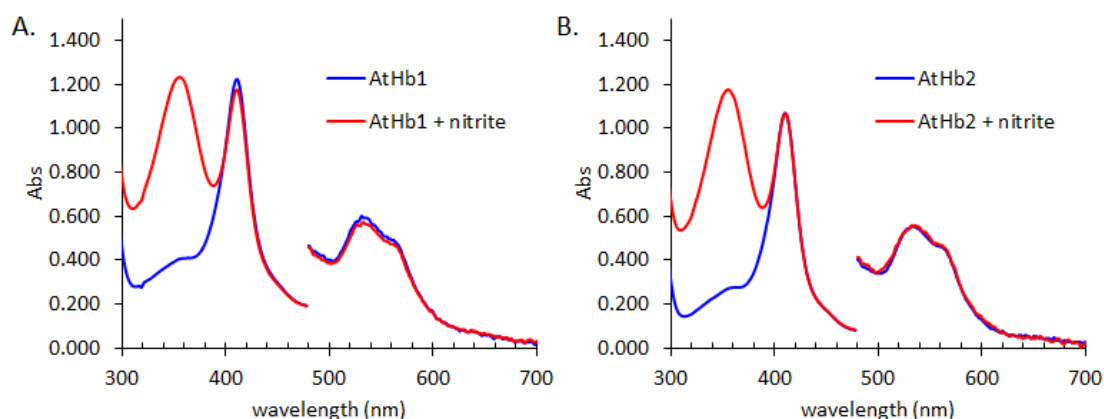

**Figure S1. UV-vis spectral changes for the recombinant methemoglobin (HbFe<sup>3+</sup>) of AtHb1 (A) and AtHb2 (B) with nitrite in aerobic conditions.** UV-vis spectra of 8  $\mu$ M methemoglobin (HbFe<sup>3+</sup>) after addition of nitrite at 40 mM, in 50 mM phosphate buffer pH 7 and 25 °C.

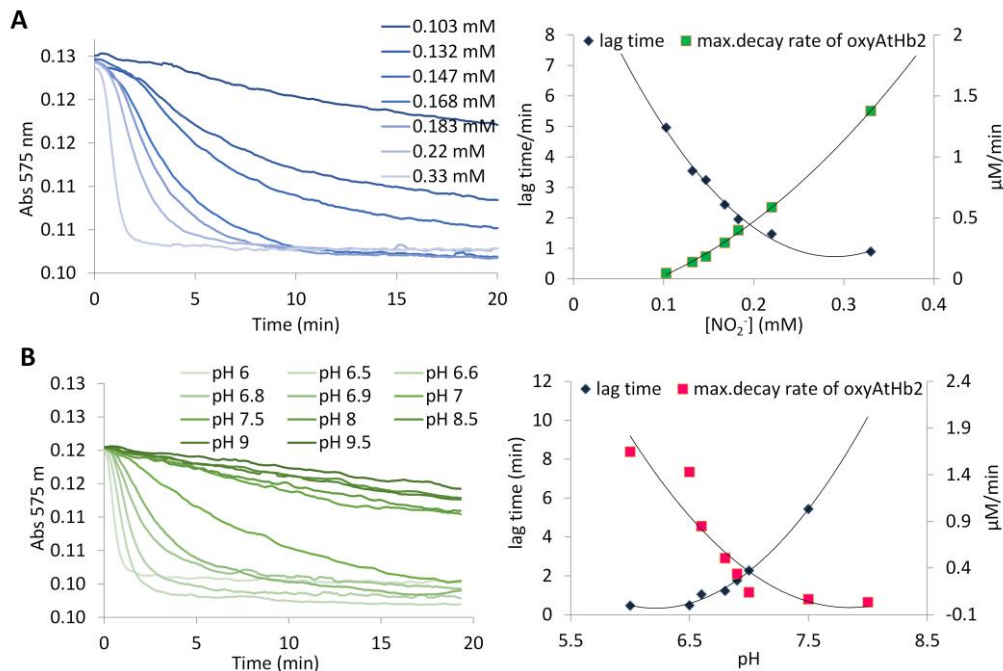

**Figure S2. Kinetic profiles and their corresponding lag times and maximum decay rates for the reaction between oxyAtHb2 and nitrite (A)** at different concentrations of sodium nitrite, 8  $\mu$ M oxyAtHb2 was incubated with NaNO<sub>2</sub> (0.103 - 0.22 mM) in 50 mM phosphate buffer pH 7 **(B)** at different pH values, 8  $\mu$ M oxyAtHb2 was incubated with 0.138 mM NaNO<sub>2</sub> in pH 6-9.5.

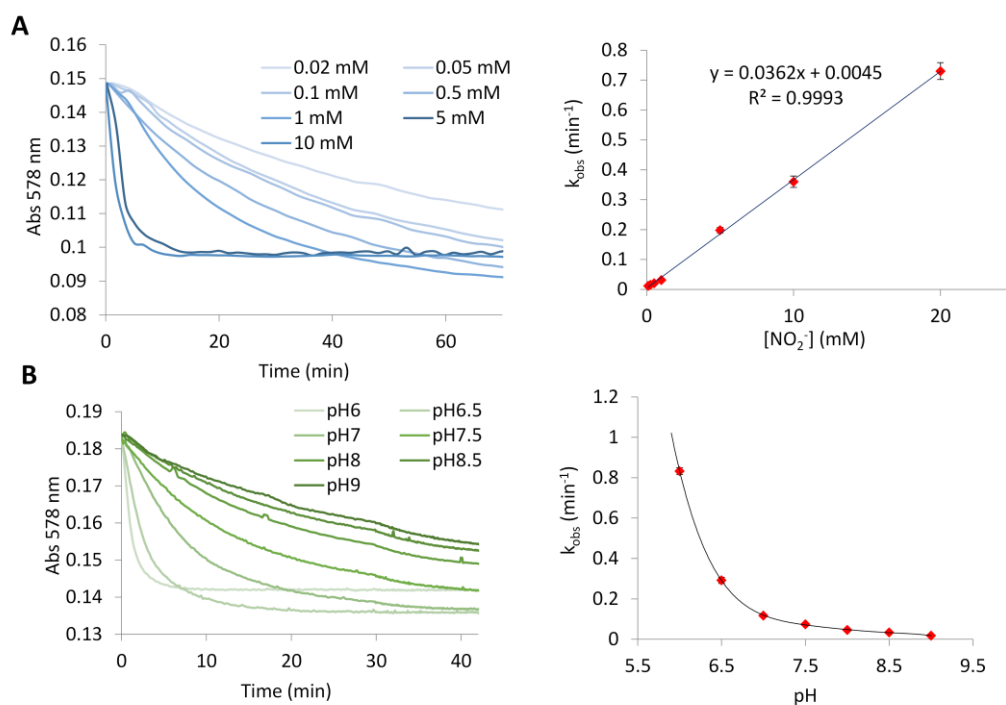

**Figure S3. Kinetic profiles and their corresponding  $k_{\text{obs}}$  values for the reaction between oxyAtHb3 and nitrite (A)** at different concentrations of sodium nitrite,  $8\mu\text{M}$  oxyAtHb3 was incubated with  $\text{NaNO}_2$  (0.02-10 mM) in 50 mM phosphate buffer pH 7 **(B)** at different pH values,  $8\mu\text{M}$  oxyAtHb3 was incubated with 5 mM  $\text{NaNO}_2$  in pH 6-9.

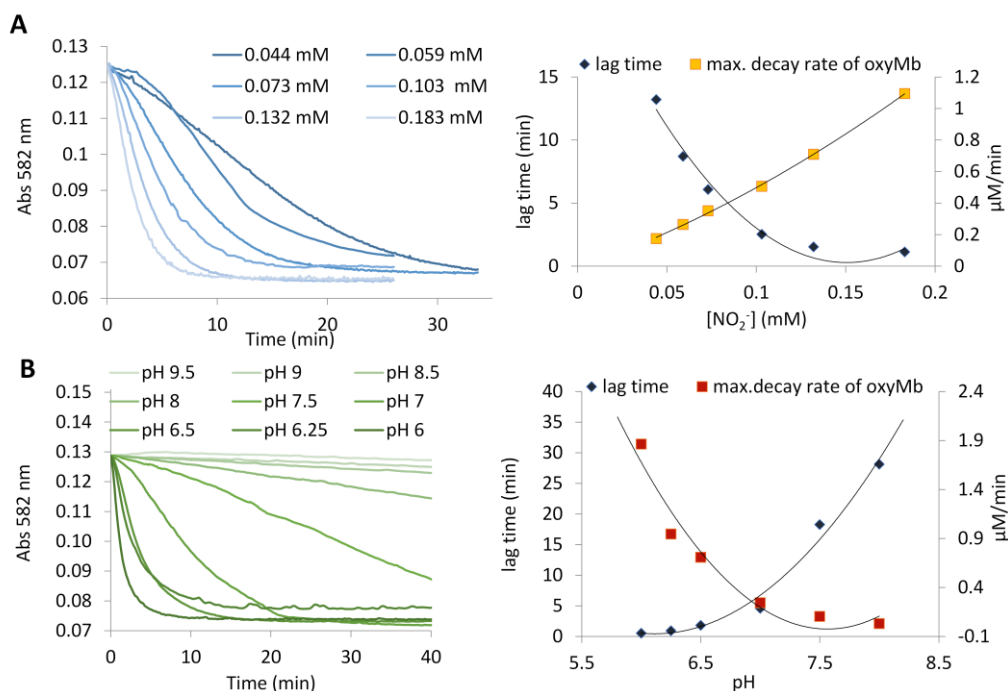

**Figure S4. Kinetic profiles and their corresponding lag times and maximum decay rates for the reaction between oxyMb and nitrite (A)** at different concentrations of sodium nitrite,  $8\mu\text{M}$  oxyMb was incubated with  $\text{NaNO}_2$  (0.044-0.183 mM) in 50 mM phosphate buffer pH 7 **(B)** at different pH values,  $8\mu\text{M}$  oxyMb was incubated with 0.073 mM  $\text{NaNO}_2$  in pH 6-9.5.

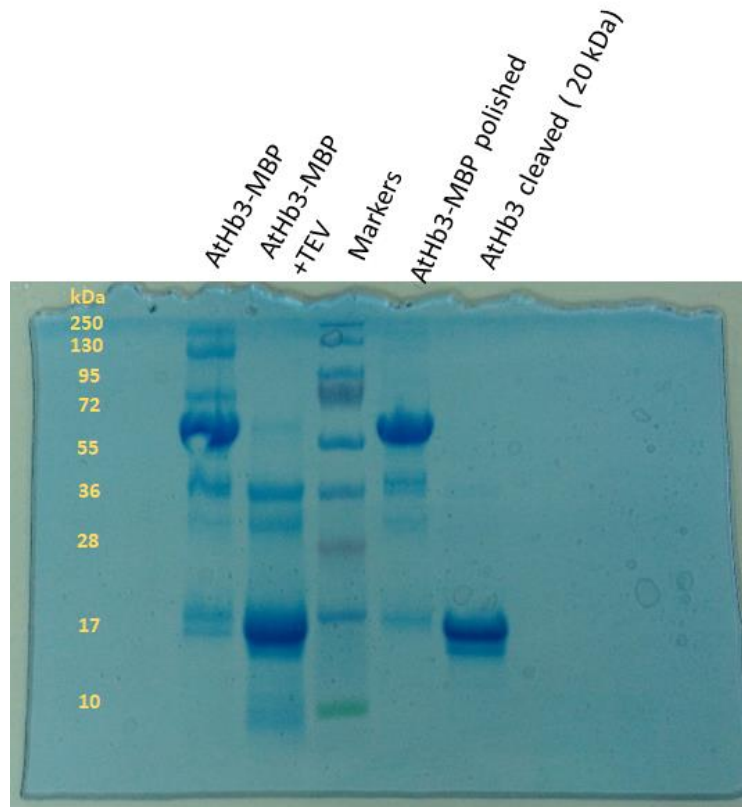

**Figure S5. Preparation of pure recombinant AtHb3 phytoglobin.** SDS-PAGE showing the TEV mediated His8-MBP removal and purification level of AtHb3. For AtHb1 and AtHb2 see reference: Mot, A.C.; Puscas, C.; Miclea, P.; Naumova-Letia, G.; Dorneanu, S.; Podar, D.; Dissmeyer, N.; Silaghi-Dumitrescu, R. Redox Control and Autoxidation of Class 1, 2 and 3 Phytoglobins from *Arabidopsis Thaliana*. Sci. Rep. 2018, 8, 13714, doi:10.1038/s41598-018-31922-4.
